# Supplementary material
Source: Springer Nature journal article supplement (https://www.springermedizin.de/resource/supplementary/12885_2008_1191_MOESM1_ESM.pdf/9471360)
Supplement: MOESM1 [file 9471360]

**A**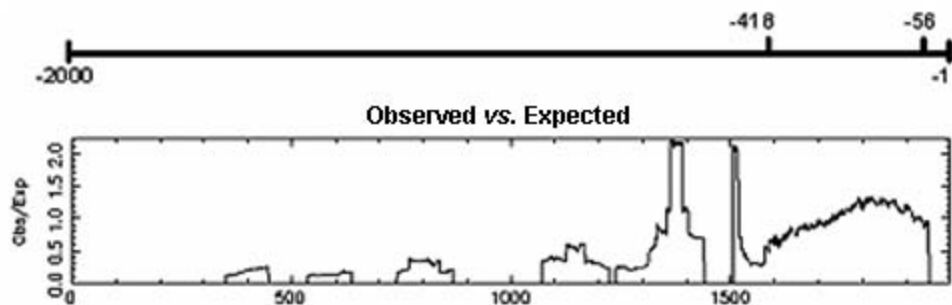**B**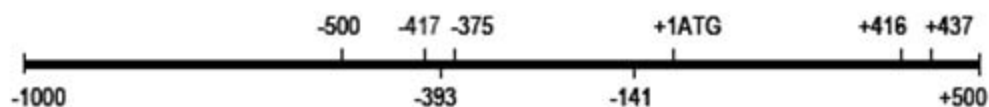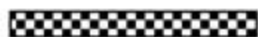

-404 → +46  
450bp promoter region  
Luciferase Assay

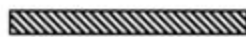

-418 → -56  
363bp CpG island  
G+C=78.79%  
EMBOSS CpGplot program

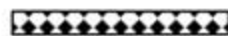

-373 → -3  
371bp CpG island  
G+C=84.4%  
Softberry CpGfinder program
